# Supplementary material for: Differential prognostic impact of interleukin-34 mRNA expression and infiltrating immune cell composition in intrinsic breast cancer subtypes
Source: PubMed Central journal article supplement (PMC5955405; doi:10.18632/oncotarget.25226), 2018-05-01
Supplement: oncotarget-09-23126-s001.pdf [file oncotarget-09-23126-s001.pdf]

## Differential prognostic impact of interleukin-34 mRNA expression and infiltrating immune cell composition in intrinsic breast cancer subtypes

### SUPPLEMENTARY MATERIALS

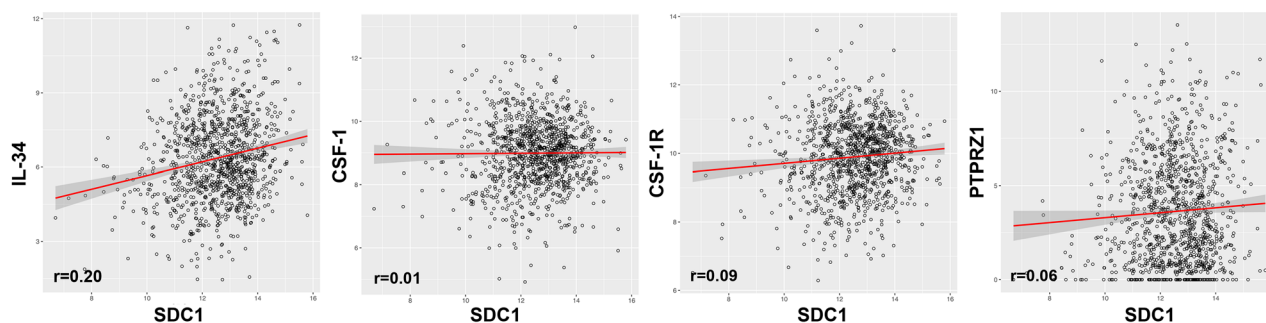

**Supplementary Figure 1: Syndecan-1 expression correlations.** Scatter plots showing the correlation between SDC1 (syndecan-1) mRNA and mRNA levels for IL-34, CSF-1, CSF-1R, and PTPRZ1 in the TCGA BRCA dataset (log<sub>2</sub> scale). Significant correlation only between IL-34 and SDC1. Pearson coefficient (r) is presented.

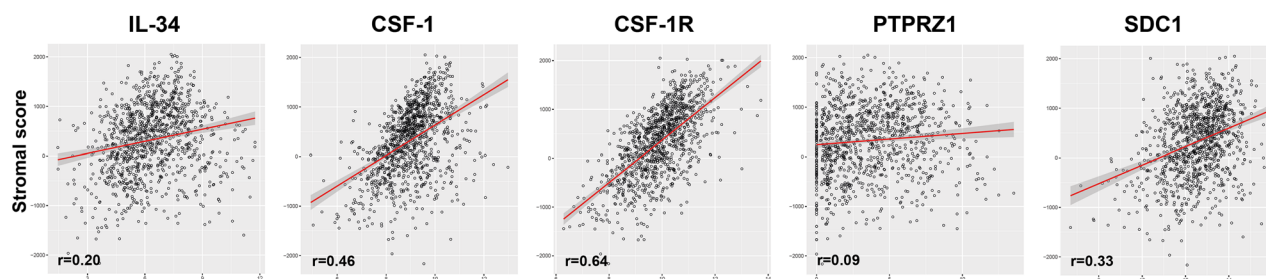

**Supplementary Figure 2: Correlation of stromal cell infiltration and gene expression in the TCGA BRCA dataset.** ESTIMATE algorithm was used to correlate the level of infiltrating stromal cells with expression of IL-34, CSF-1, CSF-1R, PTPRZ1, and SDC1 (syndecan-1) in breast cancer tissues (n = 1091). Each circle represents a single tumor sample. Regression lines and confidence intervals are shown in red and grey, respectively. X-axis: mRNA expression value (log<sub>2</sub>), Y-axis: stromal score.

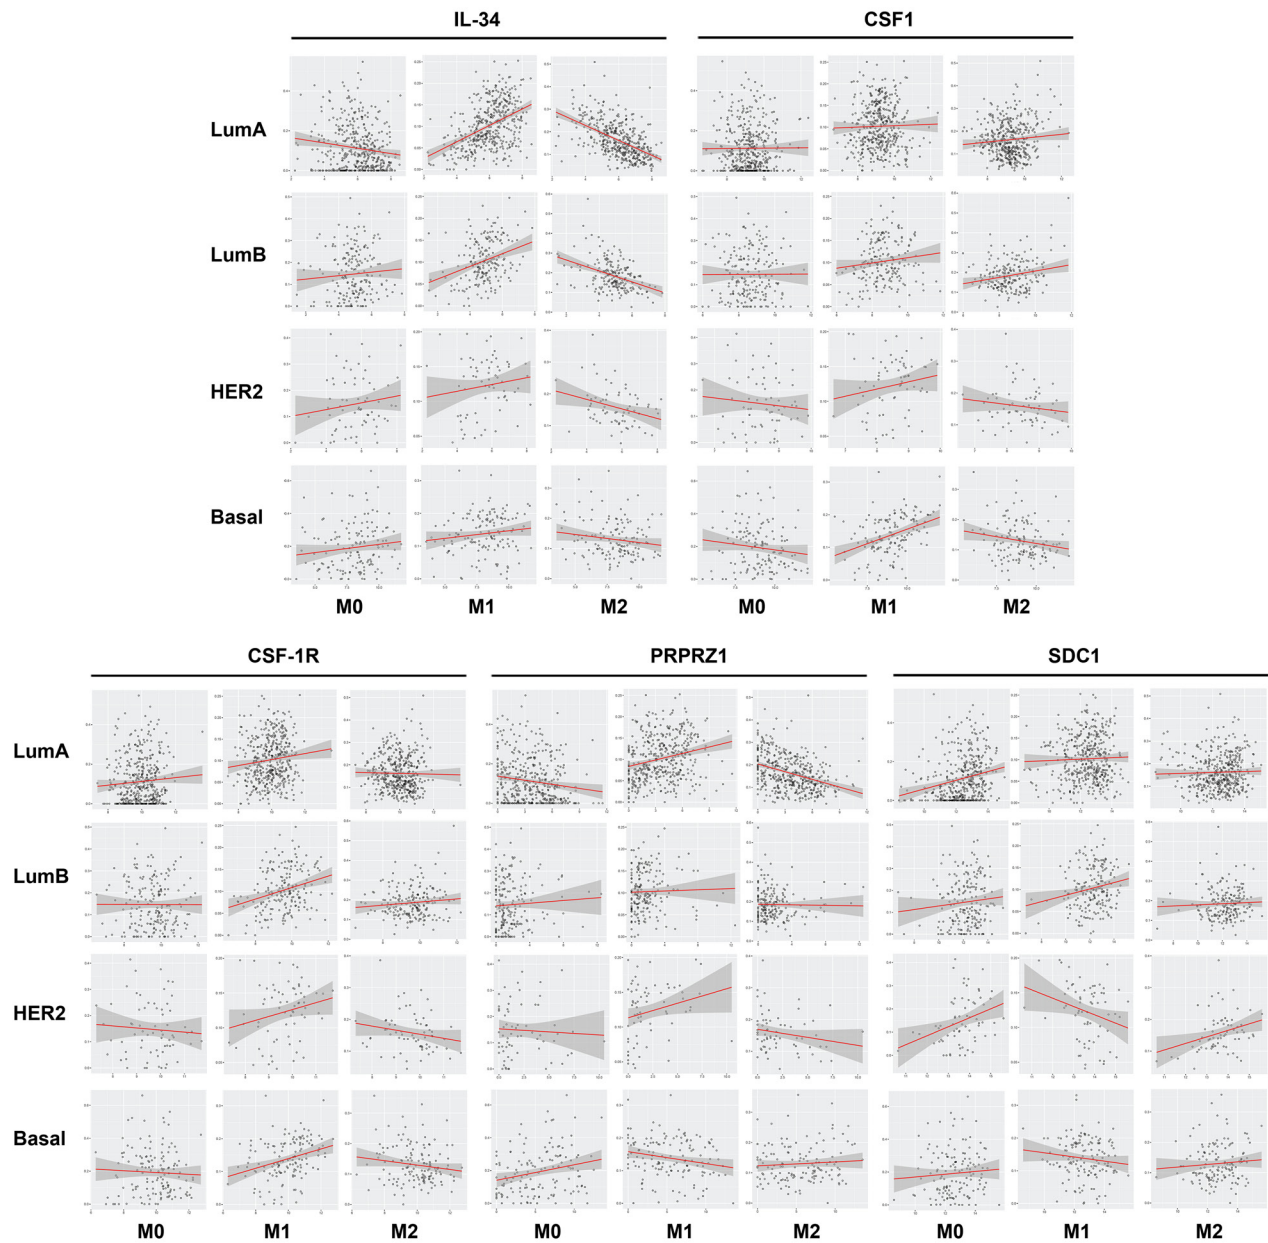

**Supplementary Figure 3: Association between mRNA expression of 5 genes and macrophage infiltration in breast tumors stratified by PAM50 calls.** Scatter plots demonstrate the correlation between *IL-34*, *CSF-1*, *CSF-1R*, *PTPRZ1* and *SDC1* mRNA expression (log2 scale) and M0, M1, M2 and monocyte infiltration scores (obtained from TCIA database) in luminal A (LumA), luminal B (LumB), HER2-enriched and basal-like (Basal) tumor samples from the TCGA BRCA dataset. Each circle represents a single tumor sample. Regression lines and confidence intervals are shown in red and grey, respectively.

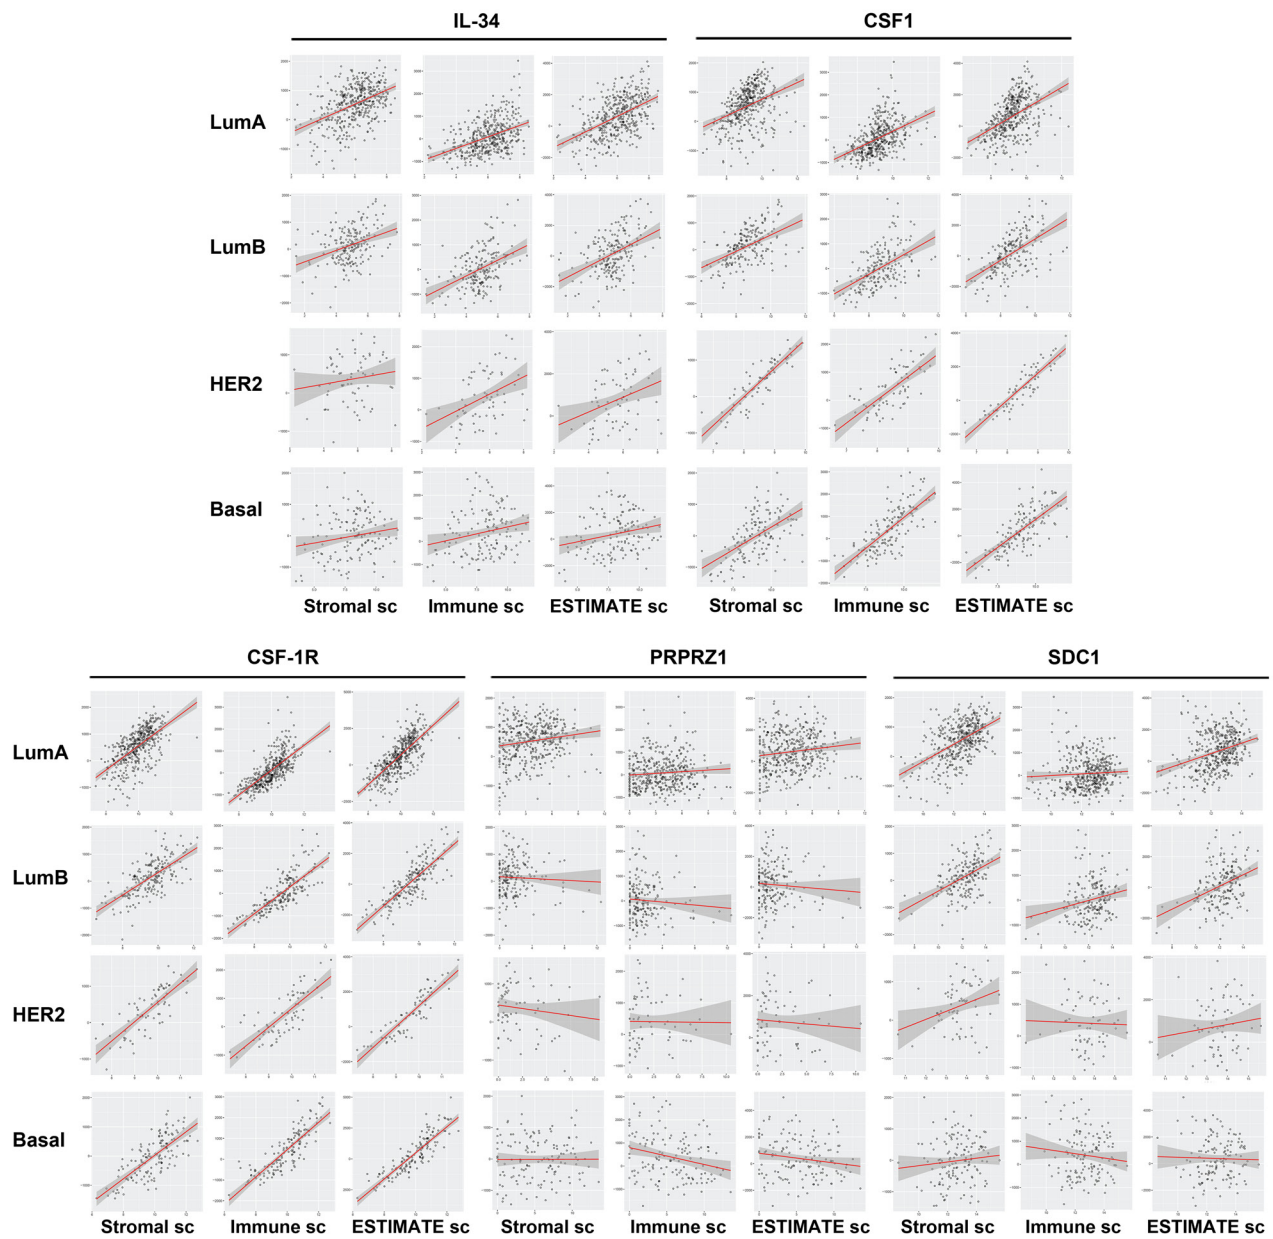

**Supplementary Figure 4: Association between mRNA expression of 5 genes and stromal cell/immune cell infiltration in breast tumors stratified by PAM50 calls.** Scatter plots demonstrate the correlation between *IL-34*, *CSF-1*, *CSF-1R*, *PTPRZ1* and *SDC1* mRNA expression (log2 scale) and stromal, immune and ESTIMATE scores (obtained from ESTIMATE database) in luminal A (LumA), luminal B (LumB), HER2-enriched and basal-like tumor samples from the TCGA BRCA dataset. Each circle represents a single tumor sample. Regression lines and confidence intervals are shown in red and grey, respectively.

**Supplementary Table 1: Immune cell landscape compared with gene expression**

|        | <b>Tumor purity</b>        | <b>B cell</b>             | <b>CD8+ T cell</b>        | <b>CD4+ T cell</b>        | <b>Macrophage</b>          | <b>Neutrophil</b>         | <b>Dendritic cell</b>     |
|--------|----------------------------|---------------------------|---------------------------|---------------------------|----------------------------|---------------------------|---------------------------|
|        | <b>r (p)</b>               | <b>r (p)</b>              | <b>r (p)</b>              | <b>r (p)</b>              | <b>r (p)</b>               | <b>r (p)</b>              | <b>r (p)</b>              |
| IL-34  | <b>-0.445 (&lt;0.0001)</b> | 0.056 (ns)                | 0.026 (ns)                | <b>0.311 (&lt;0.0001)</b> | <b>-0.147 (&lt;0.0001)</b> | <b>0.126 (&lt;0.0001)</b> | <b>0.195 (&lt;0.0001)</b> |
| CSF-1  | <b>-0.379 (&lt;0.0001)</b> | <b>0.241 (&lt;0.0001)</b> | <b>0.268 (&lt;0.0001)</b> | <b>0.400 (&lt;0.0001)</b> | <b>0.381 (&lt;0.0001)</b>  | <b>0.523 (&lt;0.0001)</b> | <b>0.479 (&lt;0.0001)</b> |
| CSF-1R | <b>-0.465 (&lt;0.0001)</b> | <b>0.414 (&lt;0.0001)</b> | <b>0.375 (&lt;0.0001)</b> | <b>0.566 (&lt;0.0001)</b> | <b>0.549 (&lt;0.0001)</b>  | <b>0.696 (&lt;0.0001)</b> | <b>0.746 (&lt;0.0001)</b> |
| PTPRZ1 | <b>-0.237 (&lt;0.0001)</b> | <b>-0.123 (&lt;0.001)</b> | 0.017 (ns)                | 0.047 (ns)                | -0.008 (ns)                | -0.019 (ns)               | -0.001 (ns)               |
| SDC1   | <b>-0.153 (&lt;0.0001)</b> | 0.018 (ns)                | -0.057 (ns)               | -0.015 (ns)               | <b>0.108 (0.0007)</b>      | 0.034 (ns)                | <b>0.107 (&lt;0.001)</b>  |

Pearson's product-moment correlation of immune cell landscape of breast cancer compared with TCGA gene expression of *IL-34*, *CSF-1*, *CSF-1R*, *PTPRZ1*, and *SDC1* (TIMER).

r, Pearson's correlation coefficient; p, p-value; ns, not significant.

**Supplementary Table 2: Macrophage infiltration scores and stromal score compared with gene expression**

|        | <b>Monocytes</b>         | <b>M0</b>                | <b>M1</b>                | <b>M2</b>                 | <b>Stromal sc</b>        |
|--------|--------------------------|--------------------------|--------------------------|---------------------------|--------------------------|
|        | <b>r (p)</b>             | <b>r (p)</b>             | <b>r (p)</b>             | <b>r (p)</b>              | <b>r (p)</b>             |
| IL-34  | -0.09 (0.002)            | 0.04 (ns)                | <b>0.31 (&lt;0.0001)</b> | <b>-0.40 (&lt;0.0001)</b> | <b>0.20 (&lt;0.0001)</b> |
| CSF-1  | <b>0.13 (&lt;0.0001)</b> | -0.08 (0.012)            | <b>0.17 (&lt;0.0001)</b> | 0.02 (ns)                 | <b>0.46 (&lt;0.0001)</b> |
| CSF-1R | 0.05 (ns)                | -0.01 (ns)               | <b>0.20 (&lt;0.0001)</b> | -0.03 (ns)                | <b>0.64 (&lt;0.0001)</b> |
| PTPRZ1 | -0.04 (ns)               | 0.04 (ns)                | <b>0.10 (&lt;0.001)</b>  | <b>-0.21 (&lt;0.0001)</b> | <b>0.09 (0.003)</b>      |
| SDC1   | -0.06 (0.034)            | <b>0.17 (&lt;0.0001)</b> | 0.07 (0.017)             | -0.01 (ns)                | <b>0.33 (&lt;0.0001)</b> |

Pearson's product-moment correlation between *IL-34*, *CSF-1*, *CSF-1R*, *PTPRZ1* and *SDC1* mRNA expression and M0, M1, M2 and monocyte infiltration scores (obtained from TCIA database) in tumor samples from the TCGA BRCA dataset. M0, M0 macrophages; M1, M1 macrophages; M2, M2 macrophages; Stromal sc, Stromal score; r, Pearson's correlation coefficient; p, p-value; ns, not significant.

**Supplementary Table 3: Macrophage infiltration and stromal cell/immune cell infiltration in breast tumors stratified by PAM50 calls**

| Luminal A subtype - Pearson's product-moment correlation |                          |                          |                           |                          |                          |                          |
|----------------------------------------------------------|--------------------------|--------------------------|---------------------------|--------------------------|--------------------------|--------------------------|
|                                                          | M0                       | M1                       | M2                        | Stromal sc               | Immune sc                | ESTIMATE sc              |
|                                                          | r (p)                    | r (p)                    | r (p)                     | r (p)                    | r (p)                    | r (p)                    |
| IL-34                                                    | <b>-0.14 (0.003)</b>     | <b>0.44 (&lt;0.0001)</b> | <b>-0.52 (&lt;0.0001)</b> | <b>0.45 (&lt;0.0001)</b> | <b>0.44 (&lt;0.0001)</b> | <b>0.50 (&lt;0.0001)</b> |
| CSF-1                                                    | 0.01 (ns)                | 0.03 (ns)                | <b>0.10 (0.0496)</b>      | <b>0.38 (&lt;0.0001)</b> | <b>0.46 (&lt;0.0001)</b> | <b>0.47 (&lt;0.0001)</b> |
| CSF-1R                                                   | 0.07 (ns)                | <b>0.12 (0.016)</b>      | -0.02 (ns)                | <b>0.61 (&lt;0.0001)</b> | <b>0.71 (&lt;0.0001)</b> | <b>0.74 (&lt;0.0001)</b> |
| PTPRZ1                                                   | <b>-0.15 (0.003)</b>     | <b>0.23 (&lt;0.0001)</b> | <b>-0.36 (&lt;0.0001)</b> | <b>0.17 (&lt;0.001)</b>  | 0.08 (ns)                | <b>0.14 (0.005)</b>      |
| SDC1                                                     | <b>0.23 (&lt;0.0001)</b> | 0.04 (ns)                | 0.03 (ns)                 | <b>0.53 (&lt;0.0001)</b> | 0.06 (ns)                | <b>0.32 (&lt;0.0001)</b> |

M0, M0 macrophages; M1, M1 macrophages; M2, M2 macrophages; Stromal sc, Stromal score; Immune sc, Immune score; Estimate sc, Estimate score; r, Pearson's correlation coefficient; p, p-value; ns, not significant.

| Luminal B subtype - Pearson's product-moment correlation |             |                          |                           |                          |                          |                          |
|----------------------------------------------------------|-------------|--------------------------|---------------------------|--------------------------|--------------------------|--------------------------|
|                                                          | M0          | M1                       | M2                        | Stromal sc               | Immune sc                | ESTIMATE sc              |
|                                                          | r (p)       | r (p)                    | r (p)                     | r (p)                    | r (p)                    | r (p)                    |
| IL-34                                                    | 0.08 (ns)   | <b>0.32 (&lt;0.0001)</b> | <b>-0.40 (&lt;0.0001)</b> | <b>0.35 (&lt;0.0001)</b> | <b>0.44 (&lt;0.0001)</b> | <b>0.44 (&lt;0.0001)</b> |
| CSF-1                                                    | 0.004 (ns)  | 0.13 (ns)                | <b>0.22 (0.002)</b>       | <b>0.48 (&lt;0.0001)</b> | <b>0.52 (&lt;0.0001)</b> | <b>0.56 (&lt;0.0001)</b> |
| CSF-1R                                                   | -0.002 (ns) | <b>0.28 (&lt;0.0001)</b> | 0.11 (ns)                 | <b>0.67 (&lt;0.0001)</b> | <b>0.79 (&lt;0.0001)</b> | <b>0.82 (&lt;0.0001)</b> |
| PTPRZ1                                                   | 0.06 (ns)   | 0.03 (ns)                | -0.02 (ns)                | -0.05 (ns)               | -0.08 (ns)               | -0.08 (ns)               |
| SDC1                                                     | 0.10 (ns)   | <b>0.19 (0.006)</b>      | 0.05 (ns)                 | <b>0.48 (&lt;0.0001)</b> | <b>0.22 (0.002)</b>      | <b>0.38 (&lt;0.0001)</b> |

M0, M0 macrophages; M1, M1 macrophages; M2, M2 macrophages; Stromal sc, Stromal score; Immune sc, Immune score; Estimate sc, Estimate score; r, Pearson's correlation coefficient; p, p-value; ns, not significant.

| HER2 subtype - Pearson's product-moment correlation |                     |                      |                      |                          |                          |                          |
|-----------------------------------------------------|---------------------|----------------------|----------------------|--------------------------|--------------------------|--------------------------|
|                                                     | M0                  | M1                   | M2                   | Stromal sc               | Immune sc                | ESTIMATE sc              |
|                                                     | r (p)               | r (p)                | r (p)                | r (p)                    | r (p)                    | r (p)                    |
| IL-34                                               | 0.15 (ns)           | 0.14 (ns)            | <b>-0.30 (0.014)</b> | 0.15 (ns)                | <b>0.42 (&lt;0.001)</b>  | <b>0.34 (0.005)</b>      |
| CSF-1                                               | -0.10 (ns)          | 0.17 (ns)            | -0.15 (ns)           | <b>0.87 (&lt;0.0001)</b> | <b>0.72 (&lt;0.0001)</b> | <b>0.90 (&lt;0.0001)</b> |
| CSF-1R                                              | -0.07 (ns)          | 0.22 (ns)            | -0.20 (ns)           | <b>0.79 (&lt;0.0001)</b> | <b>0.78 (&lt;0.0001)</b> | <b>0.89 (&lt;0.0001)</b> |
| PTPRZ1                                              | -0.05 (ns)          | 0.24 (ns)            | -0.19 (ns)           | -0.14 (ns)               | -0.01 (ns)               | -0.08 (ns)               |
| SDC1                                                | <b>0.33 (0.006)</b> | <b>-0.26 (0.032)</b> | <b>0.30 (0.012)</b>  | <b>0.30 (0.013)</b>      | -0.03 (ns)               | 0.13 (ns)                |

M0, M0 macrophages; M1, M1 macrophages; M2, M2 macrophages; Stromal sc, Stromal score; Immune sc, Immune score; Estimate sc, Estimate score; r, Pearson's correlation coefficient; p, p-value; ns, not significant.

| Basal subtype - Pearson's product-moment correlation |                     |                          |                      |                          |                          |                          |
|------------------------------------------------------|---------------------|--------------------------|----------------------|--------------------------|--------------------------|--------------------------|
|                                                      | M0                  | M1                       | M2                   | Stromal sc               | Immune sc                | ESTIMATE sc              |
|                                                      | r (p)               | r (p)                    | r (p)                | r (p)                    | r (p)                    | r (p)                    |
| IL-34                                                | 0.13 (ns)           | 0.14 (ns)                | -0.16 (ns)           | <b>0.18 (0.031)</b>      | <b>0.22 (0.010)</b>      | <b>0.23 (0.008)</b>      |
| CSF-1                                                | -0.13 (ns)          | <b>0.38 (&lt;0.0001)</b> | <b>-0.19 (0.025)</b> | <b>0.54 (&lt;0.0001)</b> | <b>0.73 (&lt;0.0001)</b> | <b>0.72 (&lt;0.0001)</b> |
| CSF-1R                                               | -0.05 (ns)          | <b>0.30 (&lt;0.001)</b>  | -0.15 (ns)           | <b>0.73 (&lt;0.0001)</b> | <b>0.84 (&lt;0.0001)</b> | <b>0.88 (&lt;0.0001)</b> |
| PTPRZ1                                               | <b>0.23 (0.005)</b> | <b>-0.21 (0.015)</b>     | 0.07 (ns)            | 0.004 (ns)               | <b>-0.26 (0.002)</b>     | -0.16 (ns)               |
| SDC1                                                 | 0.07 (ns)           | -0.13 (ns)               | 0.09 (ns)            | 0.10 (ns)                | -0.12 (ns)               | -0.03 (ns)               |

Association between mRNA expression of 5 genes and macrophage infiltration as well as stromal cell/immune cell infiltration in breast tumors stratified by PAM50 calls from the TCGA BRCA dataset.

M0, M0 macrophages; M1, M1 macrophages; M2, M2 macrophages; Stromal sc, Stromal score; Immune sc, Immune score; ESTIMATE sc, Estimate score; r, Pearson's correlation coefficient; p, p-value; ns, not significant.

M0, M1, M2 (TCIA database); Stromal sc, Immune sc, ESTIMATE sc (ESTIMATE database).
